# Supplementary material for: Mitochondrial dysfunction reduces yeast replicative lifespan by elevating RAS-dependent ROS production by the ER-localized NADPH oxidase Yno1
Source: PubMed Central journal article supplement (PMC6005541; doi:10.1371/journal.pone.0198619), 2018-06-18
Supplement: pone.0198619.s003.pdf [file pone.0198619.s003.pdf]

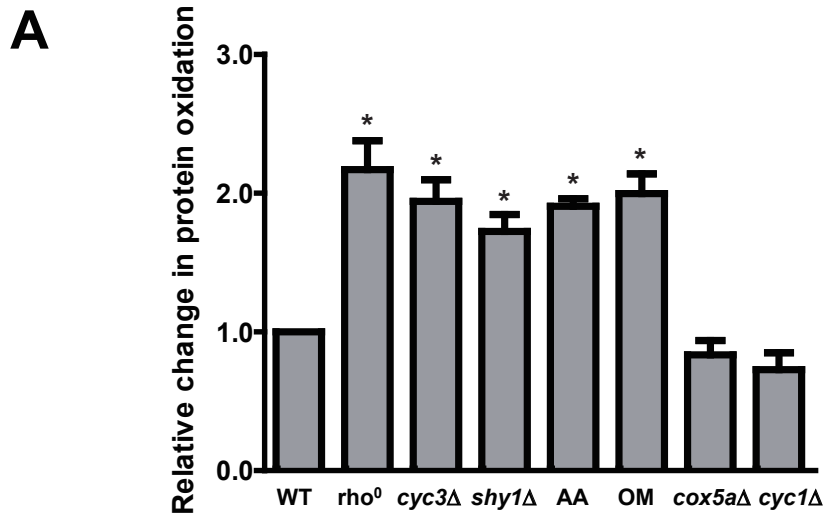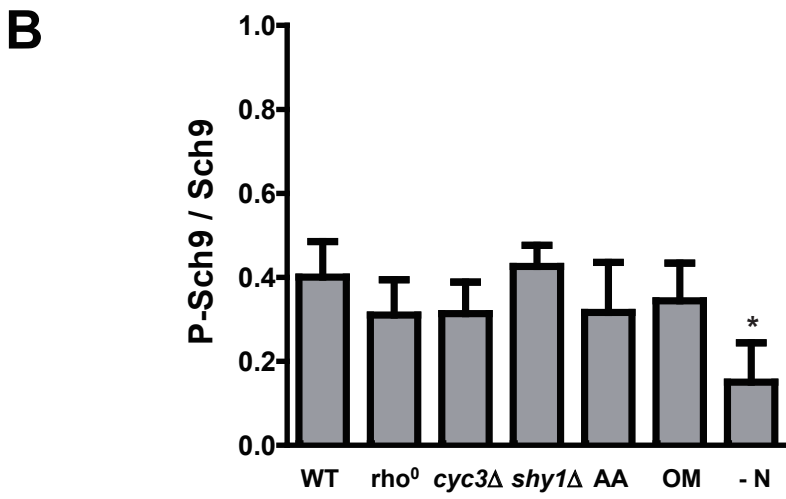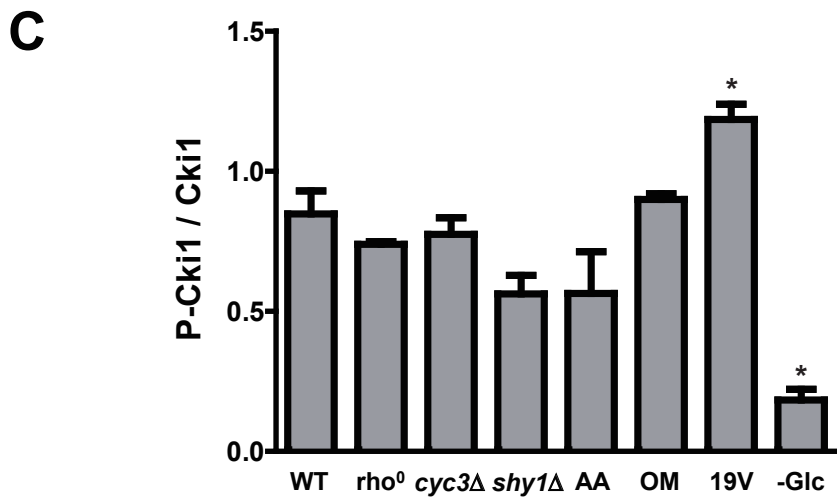

S3 Fig.
